# Supplementary material for: Calcite moonmilk of microbial origin in the Etruscan Tomba degli Scudi in Tarquinia, Italy
Source: PubMed Central journal article supplement (PMC6203712; doi:10.1038/s41598-018-34134-y), 2018-10-26
Supplement: 41598_2018_34134_MOESM1_ESM.pdf [file 41598_2018_34134_MOESM1_ESM.pdf]

## Supplementary Informations

Calcite moonmilk of microbial origin in the etruscan *Tomba degli Scudi* in Tarquinia, Italy

Angela Cirigliano<sup>1°</sup>, Maria Cristina Tomassetti<sup>2°</sup>, Marta Di Pietro<sup>1</sup>, Francesco Mura<sup>3</sup>, Maria Lorella Maneschi<sup>4</sup>, Maria Donatella Gentili<sup>5</sup>, Barbara Cardazzo<sup>6</sup>, Chiara Arrighi<sup>7</sup>, Cristina Mazzoni<sup>1</sup>, Rodolfo Negri<sup>1</sup> and Teresa Rinaldi<sup>1\*</sup>

<sup>1</sup> La Sapienza University of Rome, Dept. of Biology and Biotechnology “Charles Darwin”, Rome, 00185, Italy

<sup>2</sup> Freelance restorer, Via Flavia 16, 00062, Bracciano, Rome, Italy

<sup>3</sup> Research Center For Nanotechnology Applied To The Engineering of Sapienza (CNIS) La Sapienza University of Rome, Rome, 00185, Italy

<sup>4</sup> Archaeologist, Capo Delegazione FAI – Delegazione Viterbo, Via XX Settembre 56, 01016, Tarquinia, Italy

<sup>5</sup> Archaeologist, Via de Carolis 135, 00136, Rome, Italy

<sup>6</sup> Department of Comparative Biomedicine and Food Science, University of Padova, Viale dell’Università, 16, Legnaro, 35020, Padova, Italy

<sup>7</sup> Freelance restorer, Via San Maria Mediatrice 10, 00165, Rome, Italy

\* [teresa.rinaldi@uniroma1.it](mailto:teresa.rinaldi@uniroma1.it)

° These authors contributed equally to the work

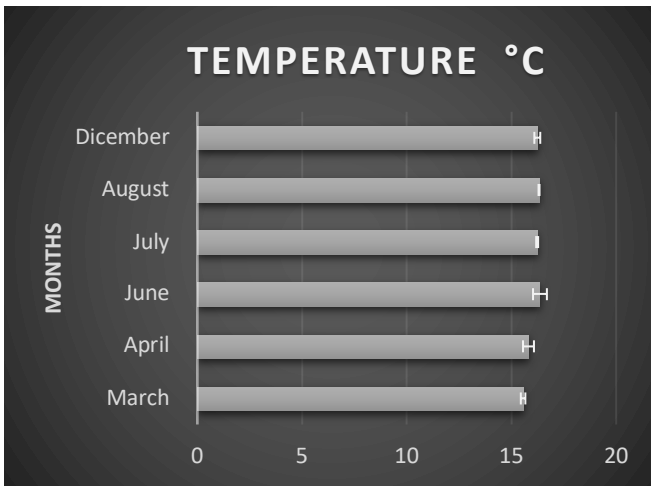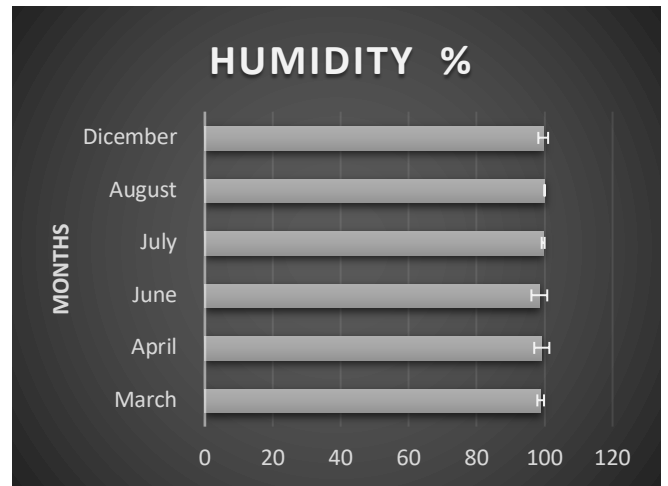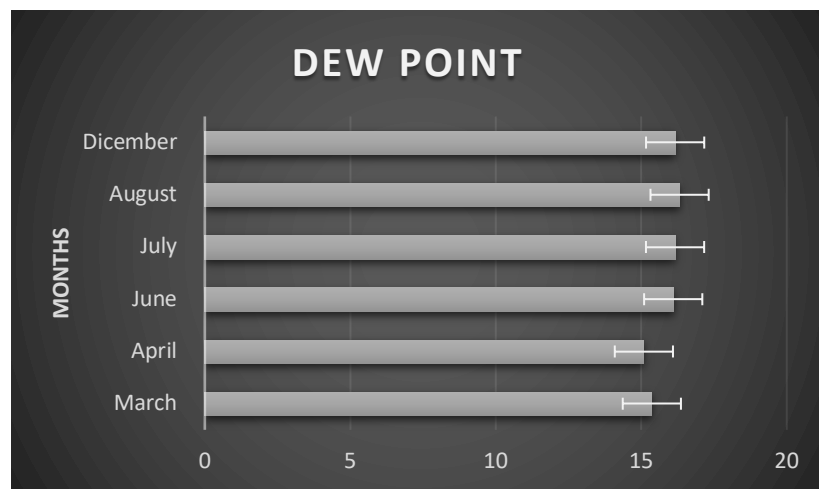

Figure S1. Temperature, humidity and dew point registered in the *Stanza degli Scudi* in the period March 2017 to December 2017.



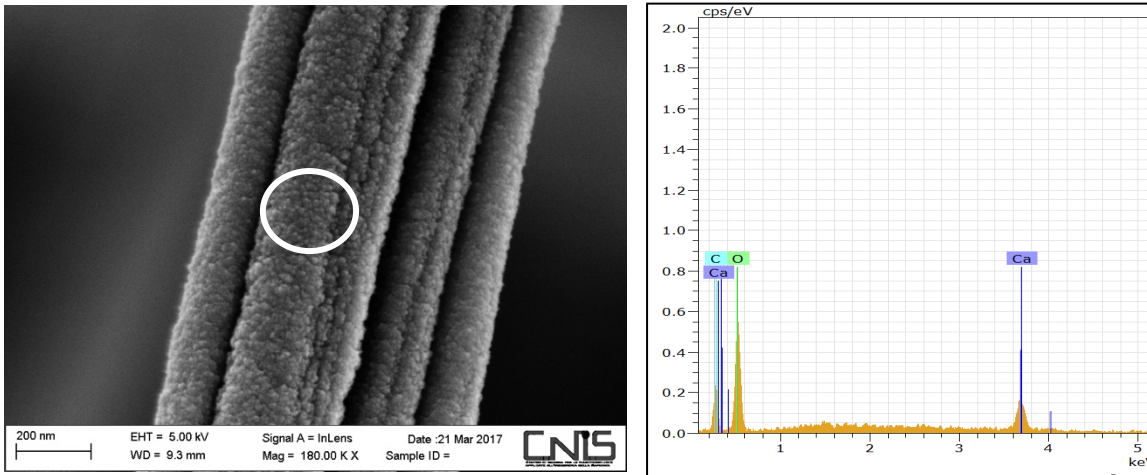

|        | El | AN       | Series | norm.  | C Atom. | C Error (1 Sigma) |
|--------|----|----------|--------|--------|---------|-------------------|
|        |    |          |        | [wt.%] | [at.%]  | [wt.%]            |
| -----  |    |          |        |        |         |                   |
| O      | 8  | K-series | 43.03  | 58.37  | 1.58    |                   |
| Ca     | 20 | K-series | 48.45  | 26.24  | 0.58    |                   |
| C      | 6  | K-series | 8.52   | 15.39  | 0.44    |                   |
| -----  |    |          |        |        |         |                   |
| Total: |    |          |        | 100.00 | 100.00  |                   |

Figure S2.  
SEM analysis of nanofibers. The atomic composition of the deposit in Figure 3 suggests a calcium carbonate composition.

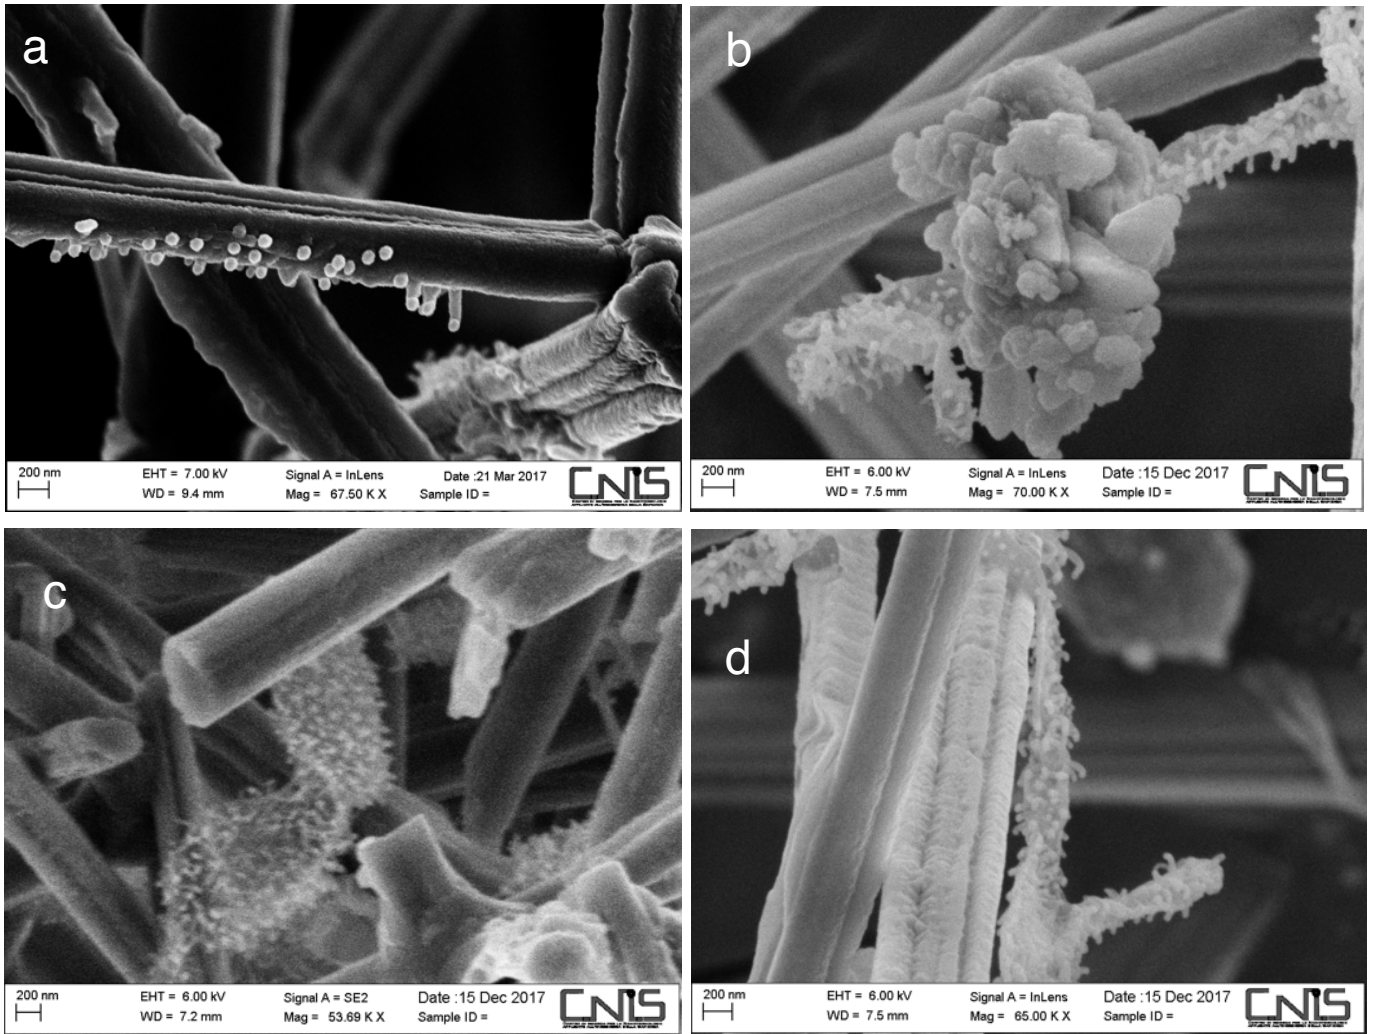

Figure S3.

SEM analysis of moonmilk isolated from the *Stanza degli Scudi*. (a) Magnification of the same microorganism of Fig. 3d and 3e wrapping a  $\text{CaCO}_3$  nanofiber; the sample was taken in March 2017. (b, c and d) Magnification of the microorganism in Fig. 3 h sampled in December 2017.

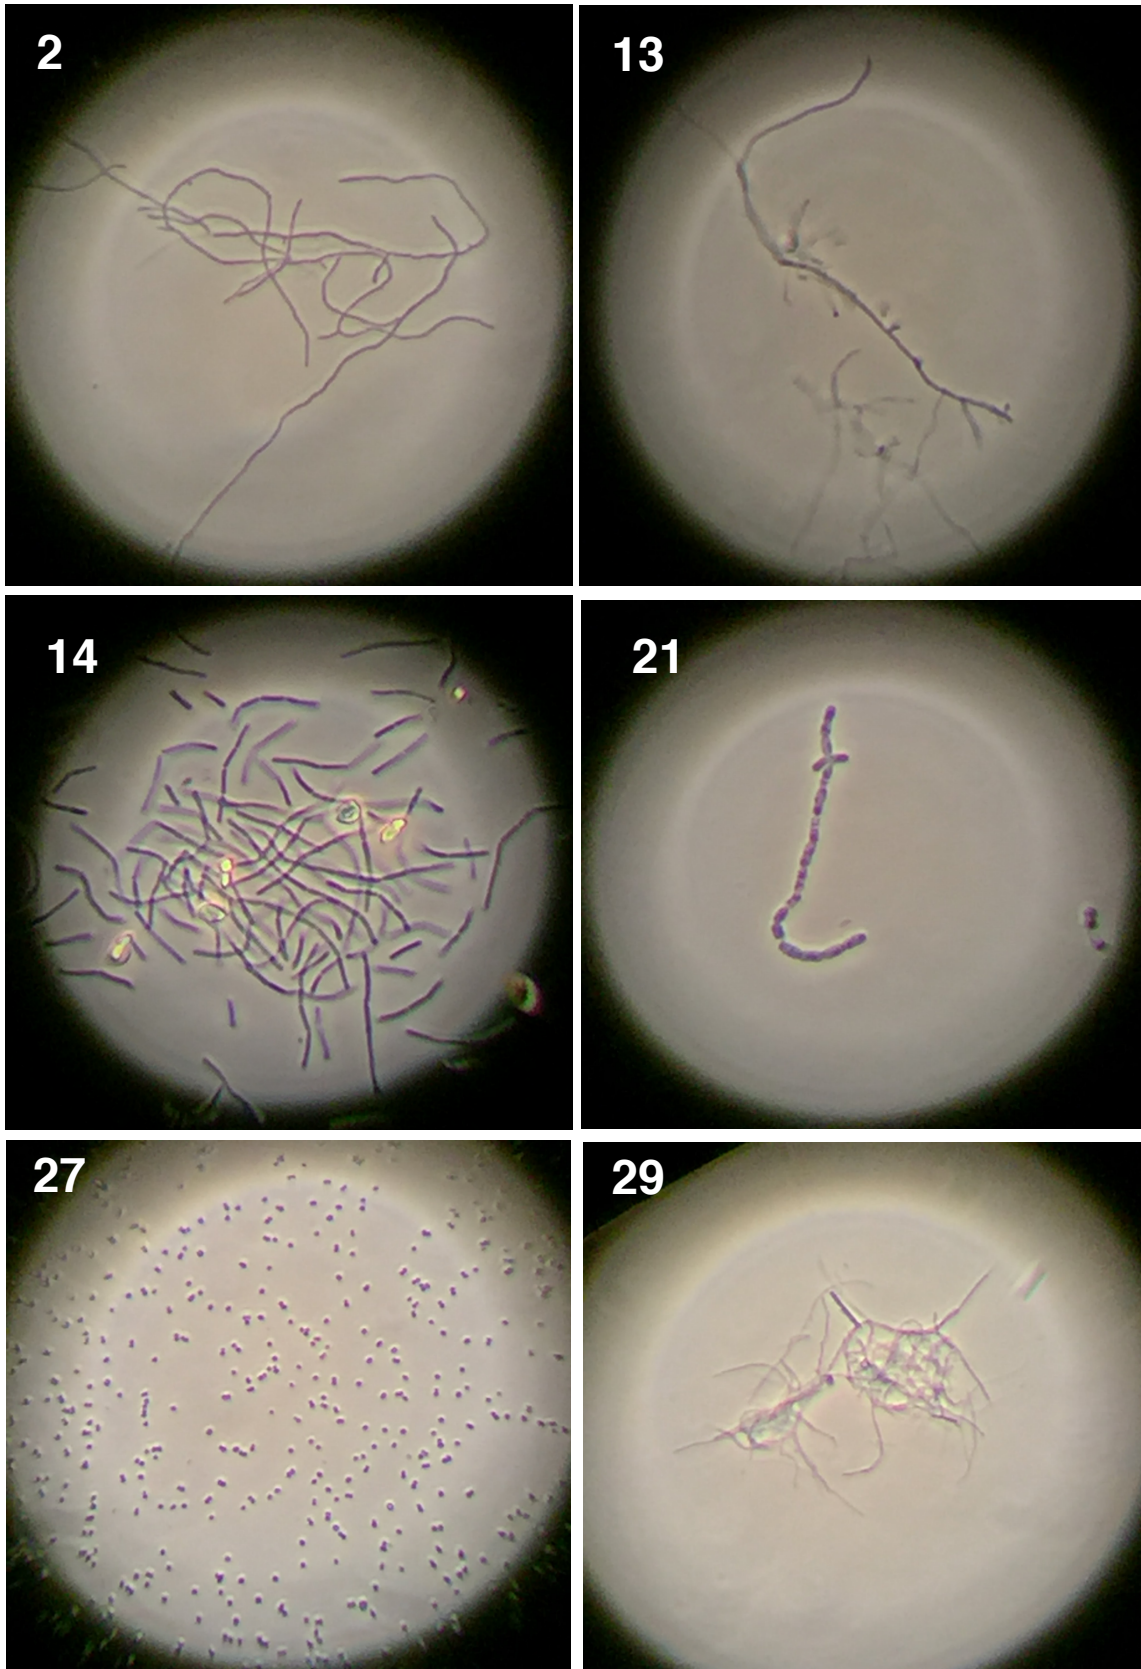

Figure S4. Examples of bacterial strains isolated from moonmilk in the *Stanza degli Scudi*. The strains were grown in complete medium and cultured at 18 °C. *Streptomyces* sp. TR2, *Streptomyces* 13, *Bacillus* 14, *Bacillus mycoides* 21, cocci 27 and *Streptomyces* 29. Pictures were taken using an Axio Star Zeiss microscope, magnification 40×.



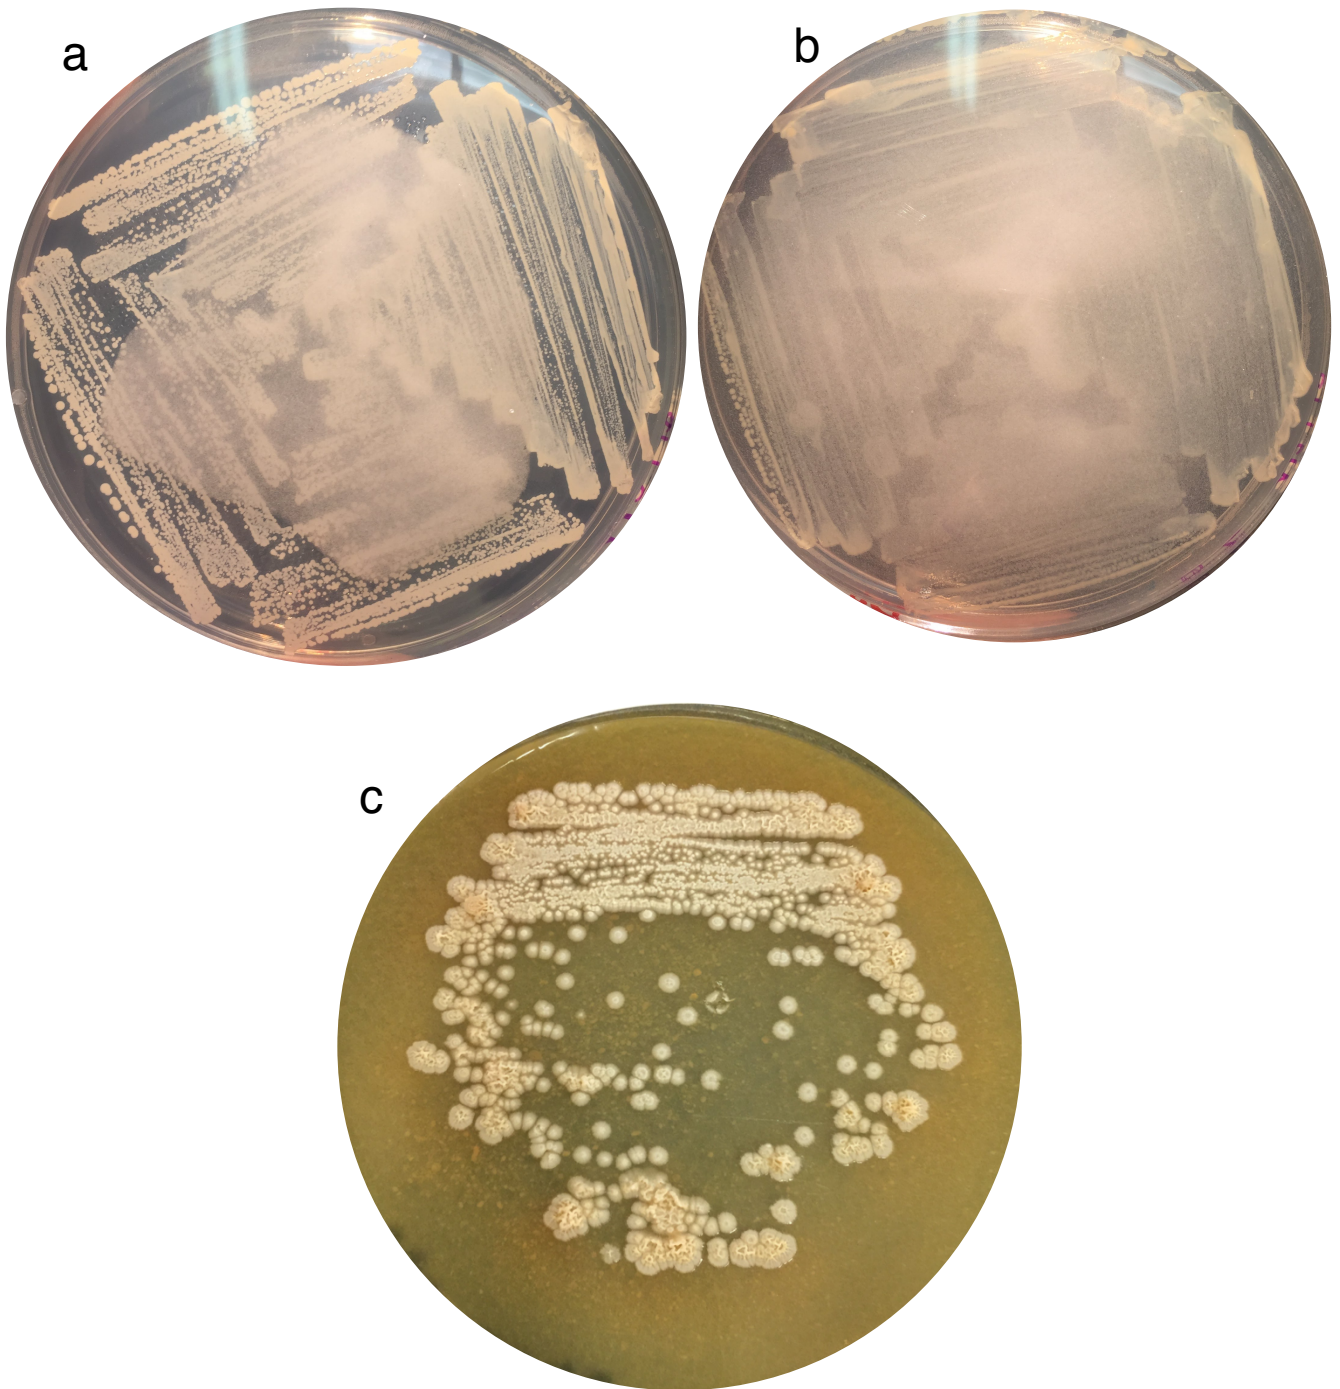

Figure S5.

Dissolution and deposition of calcium carbonate activity on plates of two strains isolated from moon-milk. a) Strain 27 was streaked on B4-C plates and during growth, the cells dissolved  $\text{CaCO}_3$ , rendering the medium transparent. b) As a control, strain 14, a *Bacillus* sp., was not able to dissolve  $\text{CaCO}_3$ , and the plate remained opaque. c) *Streptomyces* sp. TR2 was streaked on YPD supplemented with urea, and cells were observed directly with SEM (see Fig. 4f).

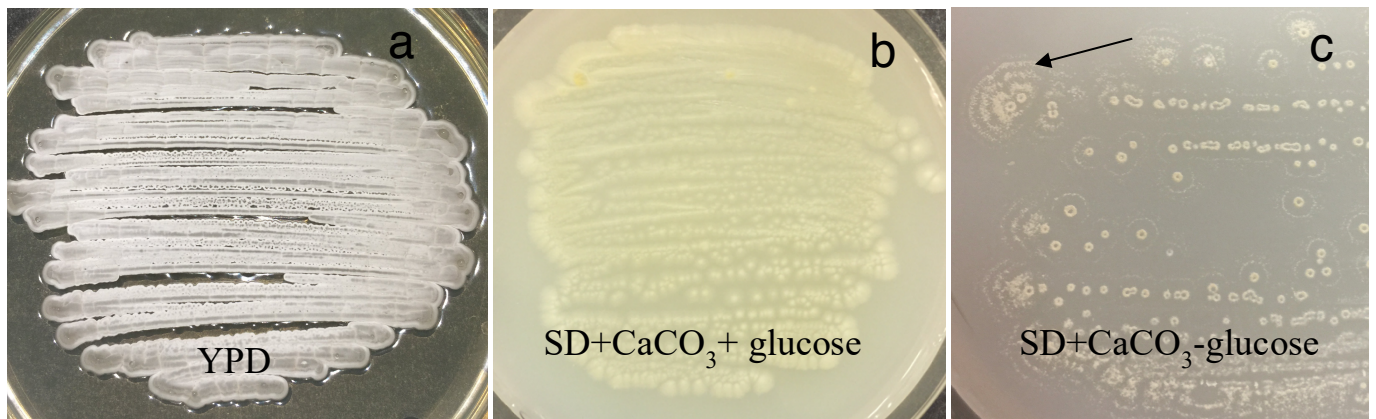

Figure S6.

Growth of *Streptomyces* colony 2 isolated from the *Stanza degli Scudi* in March 2017. (a) Complete medium YPD. (b) Synthetic medium supplemented with CaCO<sub>3</sub> and glucose. (c) Synthetic medium supplemented with CaCO<sub>3</sub> but without glucose. The black flag indicates where the SEM sample of Fig. 4 (d), (e), (f) was taken.

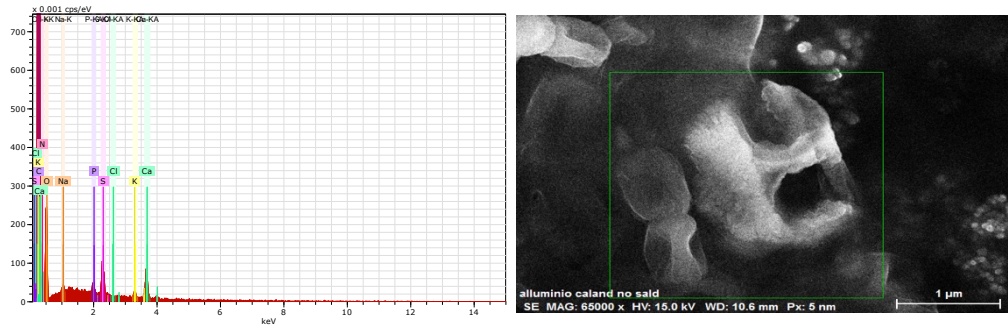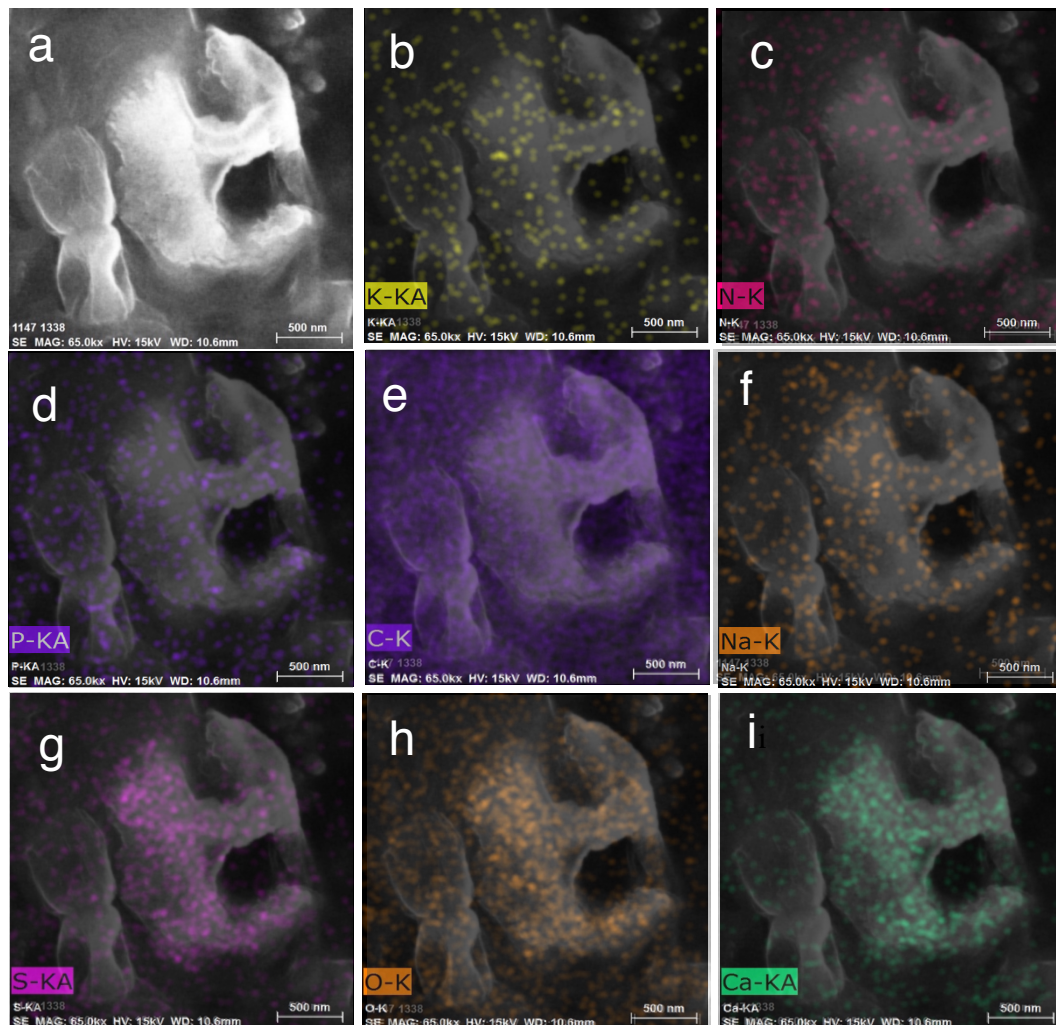

Figure S7.

SEM analysis of a pure culture of *Streptomyces 2* grown in SD medium without glucose. The atomic composition of the deposit in Figure 4e suggests a calcium sulfate composition (S5g-i).



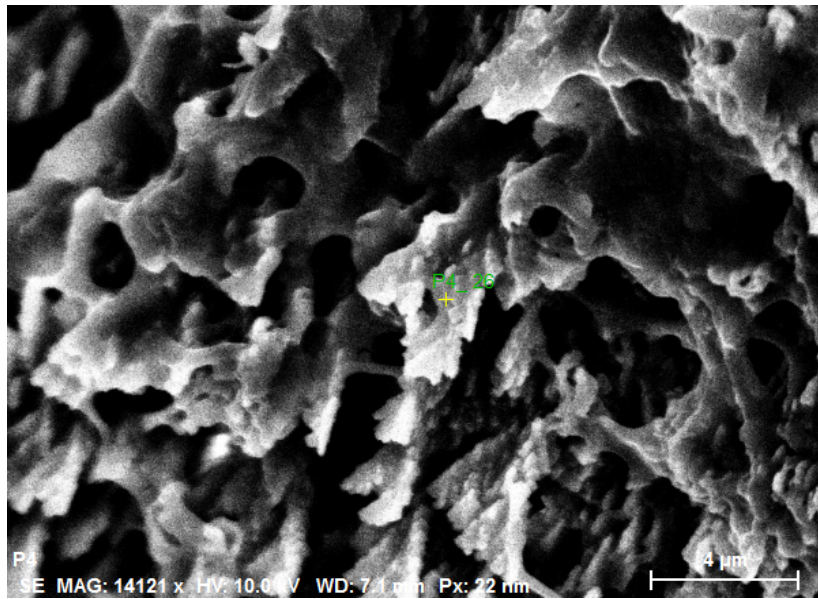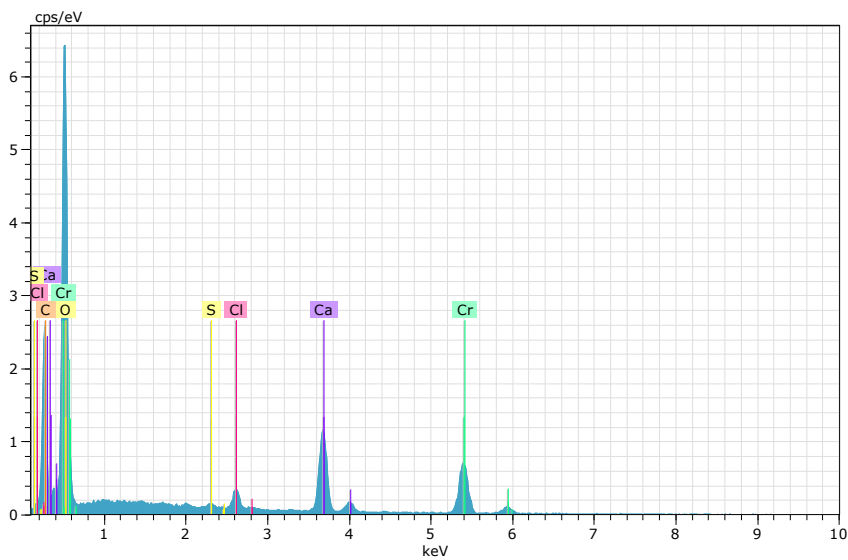

Spectrum: P4\_26

| El     | AN | Series   | unn. C<br>[wt.%] | norm. C<br>[wt.%] | Atom. C<br>[at.%] | Error (1 Sigma)<br>[wt.%] |
|--------|----|----------|------------------|-------------------|-------------------|---------------------------|
| O      | 8  | K-series | 39.05            | 58.00             | 63.57             | 5.03                      |
| C      | 6  | K-series | 11.78            | 17.50             | 25.55             | 1.77                      |
| Ca     | 20 | K-series | 14.85            | 22.06             | 9.65              | 0.56                      |
| Cl     | 17 | K-series | 1.41             | 2.09              | 1.03              | 0.09                      |
| S      | 16 | K-series | 0.24             | 0.35              | 0.19              | 0.04                      |
| Cr     | 24 | K-series | 0.00             | 0.00              | 0.00              | 0.00                      |
| Total: |    |          | 67.33            | 100.00            | 100.00            |                           |

Figure S8

SEM analysis of a pure culture of *Streptomyces 2* grown in YPD medium with urea. The atomic composition of the deposit in Figure 4f suggests a calcium carbonate composition.

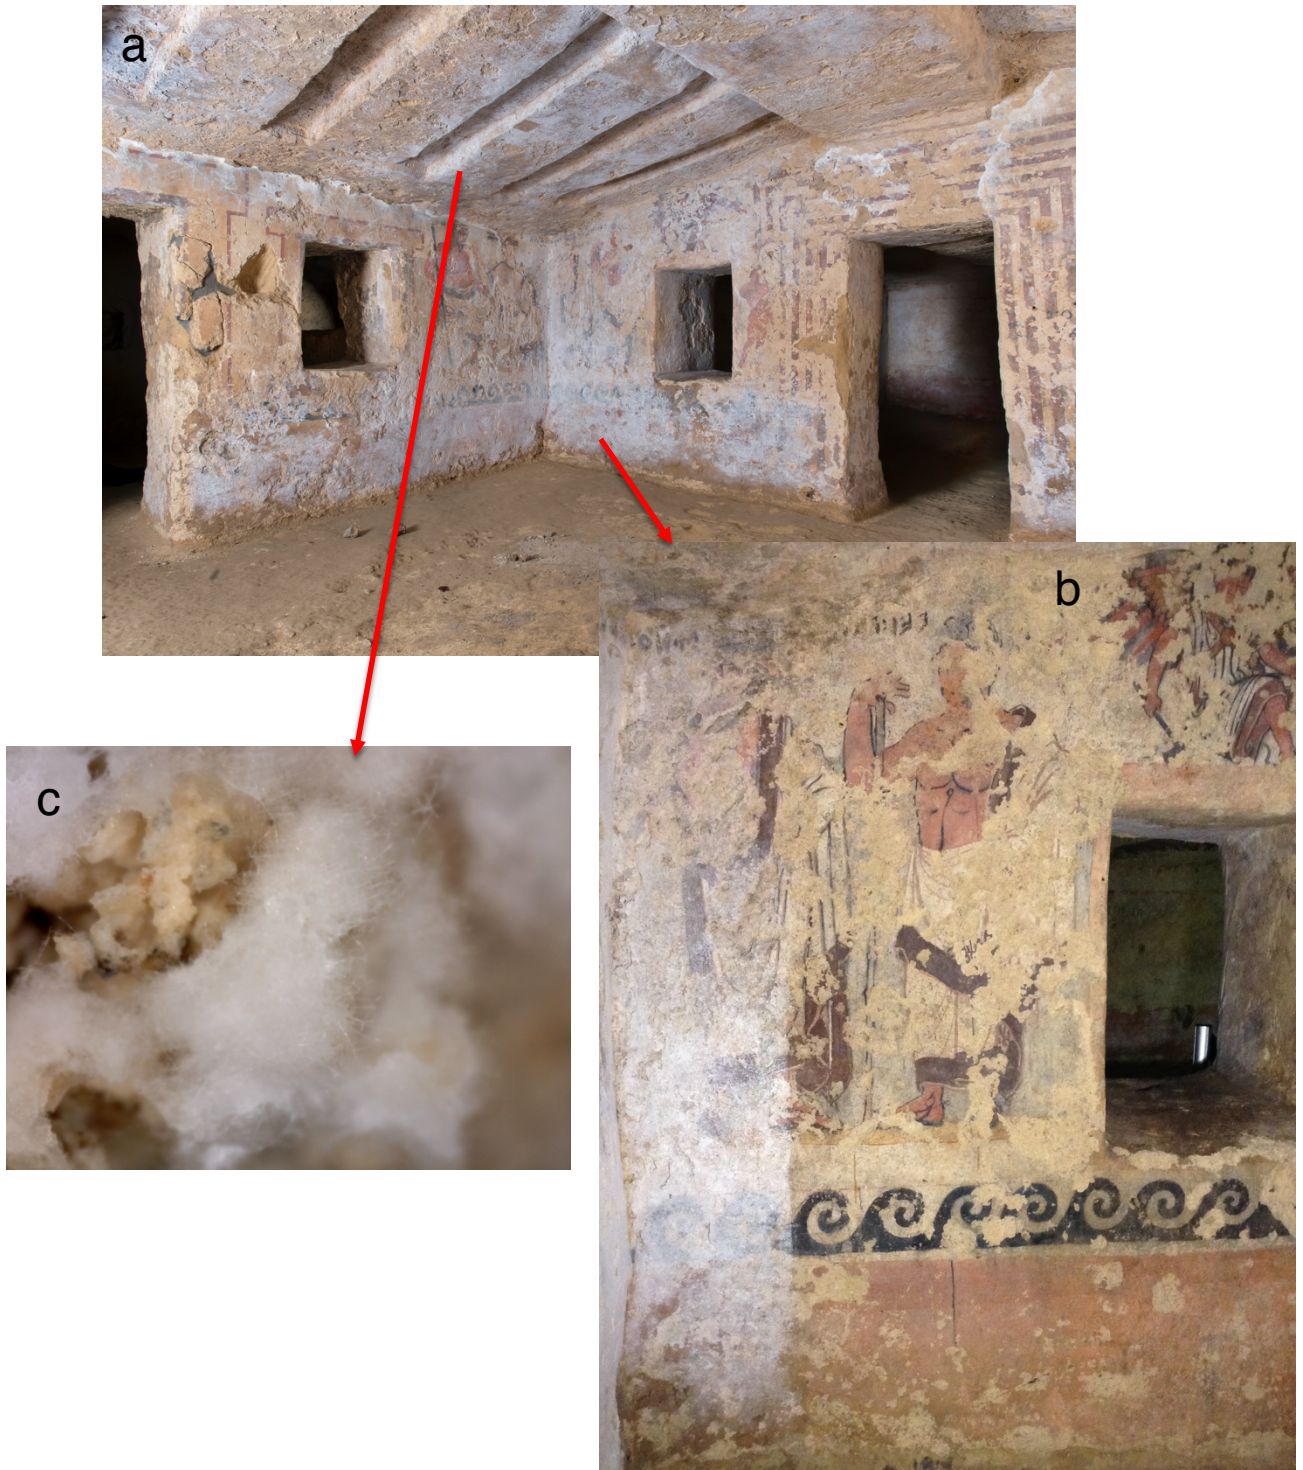

Figure S9.

Pictures of the white deposit in the central atrium in the *Tomba degli Scudi* (a) General view of the central atrium before restoration. (b) The picture shows the left part (red arrow) of the western wall during restoration; in this part of the wall the white deposit covering the frescoes was soft. (c) The soft white deposit on the roof (red arrow) was not removed during restoration; it is still in place and corresponds to moonmilk. The pictures were taken directly with a video microscope. Photographer: Domenico Ventura.



Table S1. The closest relatives bacterial species of the colony 2 isolated in *Stanza degli Scudi*.

| Strain                                                                                 | Query cover | Identity | Max score | Total score | Accession number |
|----------------------------------------------------------------------------------------|-------------|----------|-----------|-------------|------------------|
| <i>Streptomyces</i> sp. MM122 16S ribosomal RNA gene, partial sequence                 | 100%        | 99%      | 1247      | 1247        | KU714879.1       |
| <i>Streptomyces</i> sp. strain KMS5 16S ribosomal RNA gene, partial sequence           | 100%        | 99%      | 1247      | 1247        | KX950877.1       |
| <i>Streptomyces</i> sp. E1N444 16S ribosomal RNA gene, partial sequence                | 100%        | 99%      | 1247      | 1247        | KX279644.1       |
| <i>Streptomyces</i> sp. E5N142 16S ribosomal RNA gene, partial sequence                | 100%        | 99%      | 1247      | 1247        | KX279565.1       |
| <i>Streptomyces badius</i> strain DB-1 16S ribosomal RNA gene, partial sequence        | 100%        | 99%      | 1247      | 1247        | KU886090.1       |
| <i>Streptomyces</i> sp. MOLA 1484 16S ribosomal RNA gene, partial sequence             | 100%        | 99%      | 1247      | 1247        | KM273899.1       |
| <i>Streptomyces flavogriseus</i> strain Nr_2 16S ribosomal RNA gene, partial sequence  | 100%        | 99%      | 1247      | 1247        | KT714128.1       |
| <i>Streptomyces flavogriseus</i> strain ACTK2 16S ribosomal RNA gene, partial sequence | 100%        | 99%      | 1247      | 1247        | KC990785.1       |

Table S2. Features defining *genus/species* in Western and Northern walls samples.

| Taxon                                                                                                                                    | W %       | N %       |
|------------------------------------------------------------------------------------------------------------------------------------------|-----------|-----------|
| k__Bacteria;p__Actinobacteria;c__Actinobacteria;o__Actinomycetales;f__Nocardiodaceae;g__Actinopoly-morpha;s__                            | 0,3678823 | 0         |
| k__Bacteria;p__Actinobacteria;c__Actinobacteria;o__Actinomycetales;f__Nocardiodaceae;g__Krib-bella;s__                                   | 0         | 0,2336085 |
| k__Bacteria;p__Actinobacteria;c__Actinobacteria;o__Actinomycetales;f__Pseudonocardiaceae;g__Pseu-donocardia;s__                          | 5,6941779 | 3,4729793 |
| k__Bacteria;p__Chlamydiae;c__Chlamydiia;o__Chlamydiales;f__Parachlamydiaceae;g__Candidatus Pro-tochlamydia;s__                           | 0         | 0,1401651 |
| k__Bacteria;p__Firmicutes;c__Bacilli;o__Bacillales;f__Bacillaceae;g__Bacillus;s__muralis                                                 | 0         | 0,7475471 |
| k__Bacteria;p__Firmicutes;c__Bacilli;o__Bacillales;f__Paenibacillaceae;g__Paenibacillus;__                                               | 0         | 0,7008254 |
| k__Bacteria;p__Nitrospirae;c__Nitrospira;o__Nitrospirales;f__Nitrospiraceae;g__Nitrospira;s__                                            | 0,6078055 | 2,1491979 |
| k__Bacteria;p__Planctomycetes;c__Planctomycetia;o__Gemmatales;f__Gemmataceae;g__Gemmata;s__                                              | 0,3039028 | 0,7942688 |
| k__Bacteria;p__Planctomycetes;c__Planctomycetia;o__Pirellulales;f__Pirellulaceae;g__Pirellula;s__                                        | 0         | 0,4983647 |
| k__Bacteria;p__Proteobacteria;c__Alphaproteobacteria;o__Rhizobiales;f__Bradyrhizobiaceae;g__Bradyrhi-zobium;s__                          | 0,4158669 | 0,3737736 |
| k__Bacteria;p__Proteobacteria;c__Alphaproteobacteria;o__Rhizobiales;f__Hyphomicrobiaceae;g__Hy-phomicrobium;s__                          | 2,9590531 | 2,4295281 |
| k__Bacteria;p__Proteobacteria;c__Alphaproteobacteria;o__Rhizobiales;f__Hyphomicrobiaceae;g__Pe-domicrobium;s__                           | 0,5758157 | 0         |
| k__Bacteria;p__Proteobacteria;c__Alphaproteobacteria;o__Rhizobiales;f__Hyphomicrobi-aceae;g__Rhodoplanes;s__                             | 0,5118362 | 1,8532939 |
| k__Bacteria;p__Proteobacteria;c__Alphaproteobacteria;o__Sphingomonadales;f__Sphingomona-daceae;g__Sphingopyxis;s__alaskensis             | 0,1919386 | 0         |
| k__Bacteria;p__Proteobacteria;c__Betaproteobacteria;o__Burkholderiales;f__Comamonadaceae;g__Me-thylibium;__                              | 0,9916827 | 1,1991902 |
| k__Bacteria;p__Proteobacteria;c__Deltaproteobacteria;o__Bdellovibrionales;f__Bdellovibri-onaceae;g__Bdellovibrio;s__                     | 0         | 0,4672169 |
| k__Bacteria;p__Proteobacteria;c__Gammaproteobacteria;o__Legionellales;f__Coxiellaceae;g__Aqui-cella;s__                                  | 0,1599488 | 0         |
| k__Bacteria;p__Proteobacteria;c__Gammaproteobacteria;o__Xanthomonadales;f__Sinobacter-aceae;g__Nevskia;s__                               | 0,0799744 | 0         |
| k__Bacteria;p__Proteobacteria;c__Gammaproteobacteria;o__Xanthomonadales;f__Sinobacter-aceae;g__Steroidobacter;s__                        | 1,0236724 | 0,7163993 |
| k__Bacteria;p__Verrucomicrobia;c__[Spartobacteria];o__[Chthoniobacterales];f__[Chthoniobacter-aceae];g__Candidatus Xiphinematobacter;s__ | 0         | 0,6852515 |
| % on the total                                                                                                                           | 13,883557 | 16,46161  |
